# Supplementary material for: Deep sequencing-based characterization of transcriptome of trifoliate orange (Poncirus trifoliata (L.) Raf.) in response to cold stress
Source: PubMed Central journal article supplement (PMC4518522; doi:10.1186/s12864-015-1629-7), 2015-07-29
Supplement: 12864_2015_1629_MOESM3_ESM.pdf [file 12864_2015_1629_MOESM3_ESM.pdf]

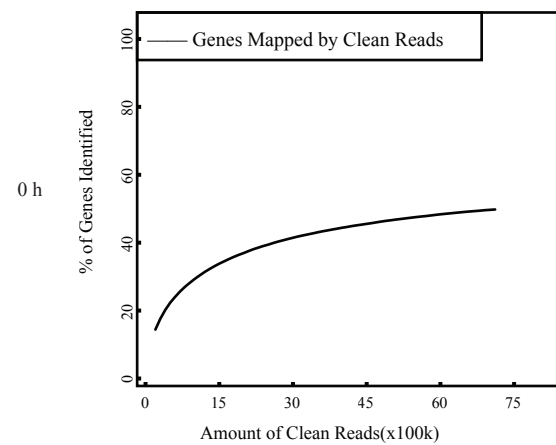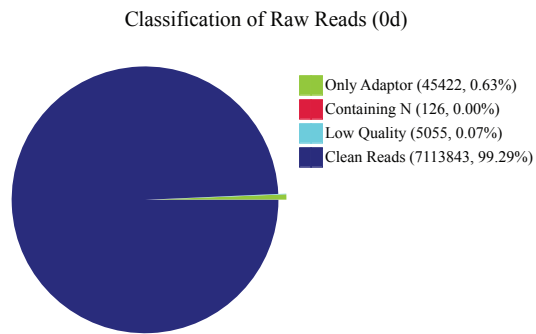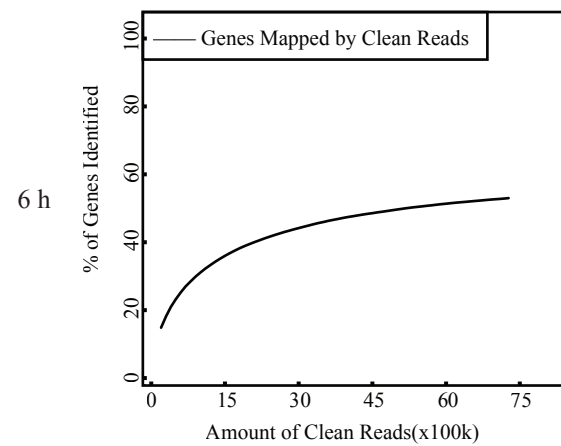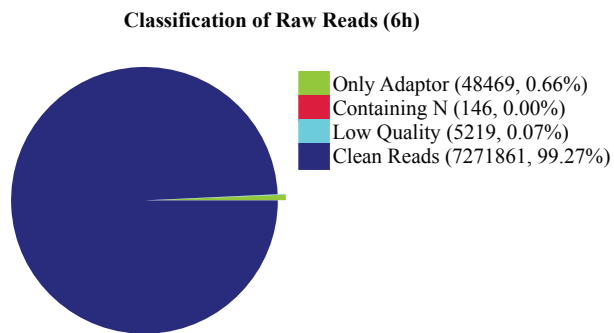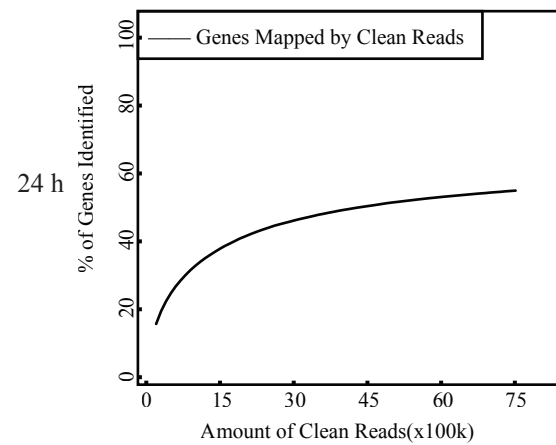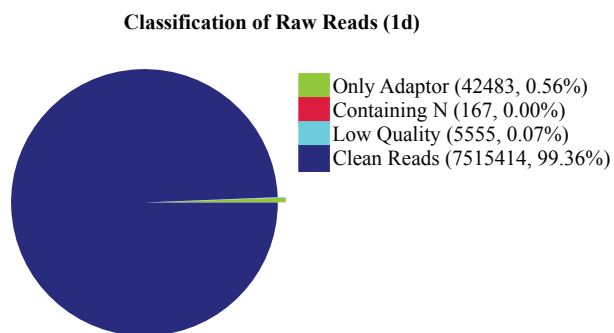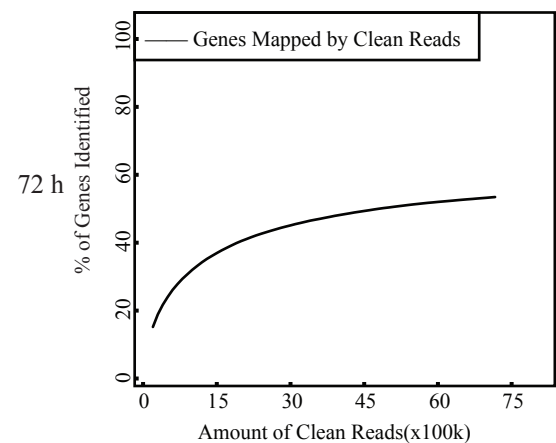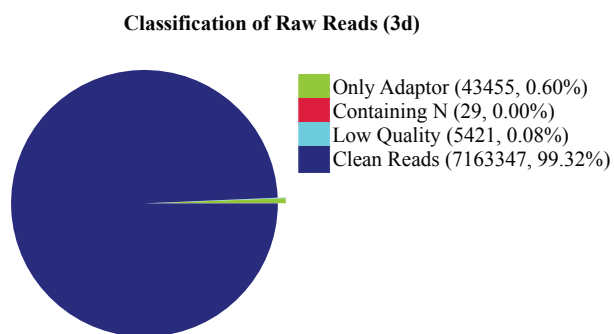

Additional file 2. Saturation evaluation of different gene expression (A) and output of clean reads (B).
