# Supplementary material for: Deep sequencing-based characterization of transcriptome of trifoliate orange (Poncirus trifoliata (L.) Raf.) in response to cold stress
Source: PubMed Central journal article supplement (PMC4518522; doi:10.1186/s12864-015-1629-7), 2015-07-29
Supplement: 12864_2015_1629_MOESM8_ESM.pdf [file 12864_2015_1629_MOESM8_ESM.pdf]

Additional file 9. A list of some of the important differentially expressed genes.

| Gene ID                                    | Gene description                                | Fold change |            |            |
|--------------------------------------------|-------------------------------------------------|-------------|------------|------------|
|                                            |                                                 | 6h vs. 0h   | 24h vs. 0h | 72h vs. 0h |
| <b>Photosynthesis-related genes</b>        |                                                 |             |            |            |
| Unigene12186_All                           | Chlorophyll A/B binding protein                 | 0.28        | -0.35      | -1.12      |
| Unigene4387_All                            | Chlorophyll A/B binding protein                 | -0.08       | -0.50      | -1.20      |
| Unigene12405_All                           | Chlorophyll a-b binding protein                 | -0.19       | -0.65      | -1.02      |
| Unigene18912_All                           | Chlorophyll A/B binding protein                 | -0.14       | -0.60      | -1.22      |
| CL216.Contig1_All                          | Chlorophyll A/B binding protein                 | -0.19       | -1.06      | -1.15      |
| CL9248.Contig2_All                         | Chloroplast pigment-binding protein CP24        | -1.66       | -2.97      | -6.60      |
| Unigene1165_All                            | Cytochrome b6-f complex iron-sulfur subunit     | -1.74       | -3.61      | -4.54      |
| Unigene28504_All                           | PSI reaction center subunit II                  | -0.28       | -1.08      | -1.81      |
| Unigene14933_All                           | Photosystem II oxygen-evolving enhancer protein | 0.10        | -0.71      | -2.07      |
| <b>ROS signal transduction</b>             |                                                 |             |            |            |
| Unigene12132_All                           | Heat shock DNA binding protein                  | 1.71        | 3.78       | 4.45       |
| CL9882.Contig2_All                         | HSF domain class transcription factor           | 1.34        | 1.74       | 2.75       |
| CL8980.Contig1_All                         | Multiprotein-bridging factor 1c                 | -0.37       | 0.78       | 1.54       |
| <b>Ca<sup>2+</sup> signal transduction</b> |                                                 |             |            |            |
| CL9078.Contig2_All                         | Calcium-dependent protein kinase                | 3.08        | 4.37       | 4.31       |
| CL4696.Contig2_All                         | Calcium-dependent protein kinase                | 3.70        | 3.60       | 3.21       |
| Unigene5810_All                            | Calcium-dependent protein kinase CDPK1          | 0.76        | 2.39       | 2.36       |
| CL653.Contig20_All                         | Calcium-dependent protein kinase                | 0.72        | 2.22       | 2.40       |
| Unigene22833_All                           | Calmodulin-binding protein                      | 3.03        | 2.97       | 1.14       |
| Unigene25450_All                           | CBL-interacting serine/threonine-protein kinase | 0.72        | 2.58       | 2.27       |
| Unigene26697_All                           | CBL-interacting protein kinase 9                | 0.42        | 1.36       | 1.01       |
| Unigene14626_All                           | CBL-interacting serine/threonine-protein kinase | 0.03        | 1.36       | 2.64       |
| CL3238.Contig1_All                         | CBL-interacting protein kinase 4                | 1.80        | 2.77       | 3.25       |
