# Supplementary material for: Deep sequencing-based characterization of transcriptome of trifoliate orange (Poncirus trifoliata (L.) Raf.) in response to cold stress
Source: PubMed Central journal article supplement (PMC4518522; doi:10.1186/s12864-015-1629-7), 2015-07-29
Supplement: 12864_2015_1629_MOESM9_ESM.pdf [file 12864_2015_1629_MOESM9_ESM.pdf]

## Additional file 8. List of primers used in qRT-PCR

### 1. Primers were used in Validation of DEG results.

| Unigene ID     | Annotation                             | Primer name      | Sequence                 |
|----------------|----------------------------------------|------------------|--------------------------|
| ACTIN          | ACTIN                                  | ACTIN-F          | CCAAGCAGCATGAAGATCAA     |
|                |                                        | ACTIN-R          | ATCTGCTGGAAGGTGCTGAG     |
| Unigene20109   | AP2/ERF                                | Unigene20109-F   | TCCTCAAAGCGACCGAGATTC    |
|                |                                        | Unigene20109-R   | CGCCGTCCAATCTTGAAT       |
| Unigene8451    | Transcription factor bHLH113           | Unigene8451-F    | TTGAATGTTGAAGTGGCGTGT    |
|                |                                        | Unigene8451-R    | GTCCATTTTCTCTCTTCTTCCAG  |
| Unigene11424   | WRKY transcription factor 6            | Unigene11424-F   | CGTTCTTTTCCCAACACTGCTA   |
|                |                                        | Unigene11424-R   | CAAGAGTCCCTTCCAATGCTGTC  |
| Unigene21580   | NAC domain protein                     | Unigene21580-F   | CGATAAGGAGGTCCAAAGTGTG   |
|                |                                        | Unigene21580-R   | ATCCATCTGATACTGAACCTTGCG |
| Unigene19023   | CHHH-type zinc finger protein 29-like  | Unigene19023-F   | TCTTTGCTCACAAGCCCGA      |
|                |                                        | Unigene19023-R   | TTCTGCCACAAGTTTCCGC      |
| Unigene8228    | Wall-associated receptor kinase-like 4 | Unigene8228-F    | AGGGTGTGCATCAATAGAAAAAGC |
|                |                                        | Unigene8228-R    | AAGTGGCATTGAATTAGGGGG    |
| Unigene23840   | Glucose-6-phosphate                    | Unigene23840-F   | ACTTCGAACCATCTCGGCTG     |
|                |                                        | Unigene23840-R   | TTGGCCTTCCGTCGTCATAG     |
| Unigene31782   | Ubiquitin-conjugating enzyme protein   | Unigene31782-F   | TGCCCATATGAGATTGGTCC     |
|                |                                        | Unigene31782-R   | GCATGTCTAGGTATGCCACC     |
| Unigene19064   | Serine/threonine-protein kinase        | Unigene19064-F   | GACTTGAATGTGGCGACGTG     |
|                |                                        | Unigene19064-R   | AGAGAAGCGTCCAACCTGCTC    |
| CL5510.Contig1 | low-temperature-induced protein        | CL5510.Contig1-F | AAGGTGCTGTAGGTTTCGTGG    |
|                |                                        | CL5510.Contig1-R | CGCTCCCCAGTAGTGTGTT      |
| Unigene25843   | Arginine decarboxylase                 | Unigene25843-F   | AGTCATTGACATCGGGGGCG     |
|                |                                        | Unigene25843-R   | GCTTGAACAACGGCAGAGGC     |
| Unigene178     | WRKY transcription factor 46           | Unigene178-F     | GCGCACTTGCACAAATTTCC     |
|                |                                        | Unigene178-R     | GGGTGCACCTGTAATACCCT     |
| CL8401.Contig1 | Serine/threonine-protein kinase        | CL8401.Contig1-F | CTGATCTCAGCTGTGCTGTTT    |
|                |                                        | CL8401.Contig1-R | CACTAATTCGACTGCATTATTGGA |
| Unigene25373   | CCCH-type zinc finger protein 18       | Unigene25373-F   | TAACCTTCCTGAGAGCCCGT     |
|                |                                        | Unigene25373-R   | TCCTTCATTCGGGATGCACT     |
| CL3540.Contig1 | Alcohol dehydrogenase-like 2           | CL3540.Contig1-F | TGTGGAGAGTGTAGGAGGAGG    |
|                |                                        | CL3540.Contig1-R | CCCTGAACCTGTTCGTTCCA     |
| CL4044.Contig2 | Predicted protein                      | CL4044.Contig2-F | GATCTAAGCCCTCACTGCCG     |
|                |                                        | CL4044.Contig2-R | ATGATGCAAAATCGGTGGCG     |
| Unigene6992    | ERF034-like                            | Unigene6992-F    | CAAGCATCGGACCTGCAGTA     |
|                |                                        | Unigene6992-R    | CCTTTGATGGCTAAAGCGGC     |

\*F represent forward primer sequence (5'-3'), R represent Reverse primer sequence (5'-3').

## 2. Primers were used in qRT-PCR of hormone-related genes.

| Gene ID        | Annotation                  | Primer name | Sequence               |
|----------------|-----------------------------|-------------|------------------------|
| CL3200.Contig4 | <i>PP2C 59</i>              | CL3200-F    | CAAAAAGCTTACCCCAGCCG   |
|                |                             | CL3200-R    | CCACATTCCAAACAGAGGGTG  |
| CL5314.Contig1 | <i>SAM synthase</i>         | CL5314-F    | CTTACGCTATTGGTGTGCC    |
|                |                             | CL5314-R    | GAAGTTTCTCCCACTTGAG    |
| CL6797.Contig1 | <i>PP2C 25</i>              | CL6797-F    | AGCCGGAGACGGAGATGAA    |
|                |                             | CL6797-R    | CTGGTCAAAGACAGCTACAG   |
| CL851.Contig21 | <i>ABA 8'-hydroxylase 1</i> | CL851-F     | GTTTCTTTGCCAAAAGGTGAAG |
|                |                             | CL851-R     | TTTTCGCCTTACGGCACCTC   |
| Unigene33085   | <i>ABA 8'-hydroxylase 3</i> | 33085-F     | ACATTGGGAAGATTCTCGGTGA |
|                |                             | 33085-R     | CATCCACTGAGAGGGGCTCA   |
| CL9038.Contig1 | <i>EIN3</i>                 | CL9038-F    | TGCAAAACCCATCAAACAAGGC |
|                |                             | CL9038-R    | CTACCGTGGTACGGTCGTTT   |
| CL9506.Contig1 | <i>JZA1</i>                 | CL9506-F    | ACTACCTTCGCAAGTAGCCG   |
|                |                             | CL9506-R    | GTCCTGAATGATCCACACATT  |
| Unigene14999   | <i>DELTA</i>                | 14999-F     | ATGCGTGCATGTTTCAGCTCC  |
|                |                             | 14999-R     | TCAAGTCCAGGATGAAATTGC  |
| Unigene19385   | <i>NCED1</i>                | 19385-F     | ACAGAGGAGCAGATTCCGGG   |
|                |                             | 19385-R     | CCTTATGGCTTCCACGGGAC   |
| Unigene20450   | <i>AUX28</i>                | 20450-F     | CGATGCAATGGCCTCGACT    |
|                |                             | 20450-R     | AGCTCCATCAACTGCCACC    |
| Unigene20820   | <i>SAMDC</i>                | 20820-F     | CTCAGGATGGTTTGCGGACG   |
|                |                             | 20820-R     | TCTTGGTCTCTGAATCGAGG   |
| Unigene21338   | <i>ACC oxidase</i>          | 21338-F     | TCTGCCGATACTGAATGGC    |
|                |                             | 21338-R     | AACACTCGATGCTCCACGCT   |
| Unigene25908   | <i>ARR5</i>                 | 25908-F     | TTTTGTGCAGGGAAGAGGCAAT |
|                |                             | 25908-R     | TGAGTGGTGGGGTTTGACTGT  |

\*F represent forward primer sequence (5'-3'), R represent Reverse primer sequence (5'-3').

### 3. Sequence of *ACTIN* gene

>*ACTIN*

TATTCCTTGGCTCTTCCGCTTCTCTCACTACTACATTTTTTAATCTCTCGGCAG  
TACCAAATACAGAGCGATAGAGAGAATCGACACTCTCAGCTAGACTCCATC  
TTCGAATTTTTCTCTCGTCGTCTCTTCAATCTAACTTTTATAAAAAATGGCCG  
ATGCTGAGGATATTC AACCCCTTGTTTGTGACAATGGAAC TGG AATGGTGA  
AGGCTGGATTTGCTGGAGATGATGCTCCAAGGGCAGTATTCCCTAGTATTGT  
TGGTAGGCCTCGACACACTGGAGTCATGGTTGGAATGGGGCAGAAGGATG  
CCTATGTTGGTGATGAGGCCCAATCGAAAAGAGGTATTCTTACTTTGAAATA  
CCCAATTGAGCACGGTATTGTAAGCAACTGGGATGATATGGAAAAGATCTG  
GCATCATACCTTCTACAACGAGCTTCGTGTTGCTCCTGAAGAGCACCCAGT  
GCTTCTCACTGAGGCACCTCTTAACCCCAAGGCCAACAGAGAGAAGATGA  
CCCAAATTATGTTTGAACTTTCAATGTGCCAGCCATGTACGTTGCCATCCA  
GGCTGTTCTATCTCTTTATGCCAGTGGTCGTACAAC TGGTATTGTGCTGGAT  
TCTGGTGATGGTGTGTCTCATACTGTACCAATTTATGAGGGATATGCCCTTCC  
TCATGCCATTCTTCGTTTGGACTTGGCTGGTCGTGATCTCACTGATGCATTG  
ATGAAGATTCTTACTGAGAGAGGTTACATGTTTACCACCACAGCCGAACGG  
GAAATTGTCCGTGACATGAAGGAGAAGCTTGCTTATGTTGCCCTAGACTAT  
GAGCAAGA ACTTGAGACTGCCAAGAGCAGCTCATCTGTTGAGAAGA ACTA  
TGAGCTGCCTGATGGCCAGATCATCACCATTGGAGCTGAAAGATTCCGTTG  
CCCAGAAGTTCTGTTCCAGCCATCTCTCATCGGAATGGAAGCTGCTGGTATT  
CATGAGACTACCTACA ACTCCATCATGAAGTGTGATGTGGATATTAGAAAG  
GATCTGTATGGTAACATTGTTCTCAGTGGGGGTTCAACTATGTTCCCCGGTA  
TTGCCGACCGTATGAGCAAGGAAATCACAGCACTTGCTCCAAGCAGCATG  
AAGATCAAGGTCGTGGCTCCACCAGAGAGAAAATACAGTGTTTGGATTGG  
AGGATCAATCCTTGCATCCCTCAGCACCTTCCAGCAGATGTGGATCTCAA  
GGGCGAGTATGATGAGTCTGGTCCATCCATTGTCCACAGGAAATGCTTCTA  
AGTTCTTTAAGTGCTTGATGGGTGAGTTCTTTTTTTCCATTTAGTTGGTTTTT  
TGTGTCTCGTTTCGCGAACTCAAGTTGGTTGACATGGAGAAGTGCTAAGGT  
TGGGGCCATTGAAGGAGGCATATCTCGATATTGATGTTATTATACAAGCTTCT  
TACAGCGTTTGAGGGGGGCTTATTTCTGTACTCAACCGTCTTCCCTTGCCCTG  
CATT CATCTGGTGTTC AACCAAGTCTTTTTTTCTTTTTTTTCCTTTTTTTTTTT  
AAAGTAGGATGTTTGTAGCTGGAGATGAAGAGTGGTTGTGATGCTTTTCTAT  
TTCATTTTCTAAATTTTCATATTTGAAGGTTTTTTTTCTCCCCCTCTCAAAG  
GAACATTAATGTTAATAGCTATTGTATGAGAAA ACTTTAATTAGTGT CAGCTT  
GCAGTCATAAATTTGGTTATTA AAAATATATTTAATACTTGT TTGAGAGCTTTC  
AA
